# Supplementary material for: Relationship between the molecular structure of V2O5/TiO2 catalysts and the reactivity of SO2 oxidation
Source: Royal Society of Chemistry journal article supplement (doi:10.1039/c5cy00867k), 2015-09-15
Supplement: c5cy00867k1.pdf [file c5cy00867k1.pdf]

**Supplementary Information for:**

**Relationship between the molecular structure of V<sub>2</sub>O<sub>5</sub>/TiO<sub>2</sub> catalysts  
and the reactivity of SO<sub>2</sub> oxidation**

**Authors:** Peidong Ji<sup>a</sup>, Xiang Gao<sup>a, \*</sup>, Xuesen Du<sup>a, b</sup>, Chenghang Zheng<sup>b</sup>, Zhongyang Luo<sup>a</sup>, Kefa Cen<sup>a</sup>

**Affiliations:** <sup>a</sup> State Key Laboratory of Clean Energy Utilization, Zhejiang University, Hangzhou 310027, China

<sup>b</sup> Key Laboratory of Low-grade Energy Utilization Technologies & Systems of Ministry of Education of China, College of Power Engineering, Chongqing University, Chongqing 400044, China

**Xiang Gao \* (corresponding author),**

Address: State Key Laboratory of Clean Energy Utilization, Zhejiang University,  
No.38 Zheda Road, Hangzhou, Zhejiang PRC 310027 P.R., China.

Tel: +86-13505711887

Fax: +86-571-87951616

Email: xgao1@zju.edu.cn

The temperature dependence of the oxidation of SO<sub>2</sub> to SO<sub>3</sub> was investigated as shown in Fig. S1. The SO<sub>2</sub> oxidation reaction rates over V<sub>2</sub>O<sub>5</sub>/TiO<sub>2</sub> catalysts were calculated in the temperature range 300-400 °C, where the SO<sub>2</sub> conversion is less than 20%. The data were analyzed by assuming a simplified plug-flow reactor model and a rate equation first order in SO<sub>2</sub> and zero order in O<sub>2</sub>. According to the pseudo-first-order rate constant of SO<sub>2</sub> oxidation,  $k_{SO_2}$ , can be expressed as follows<sup>1</sup>:

$$k_{SO_2} = -\frac{Q}{V_c} \frac{T + 273}{273} \ln(1 - X_{SO_2})$$

where  $Q$  is the total gas flow rate (ml/s (NTP)),  $V_c$  is the total catalyst volume (ml), and  $X_{SO_2}$  is the SO<sub>2</sub> conversion.

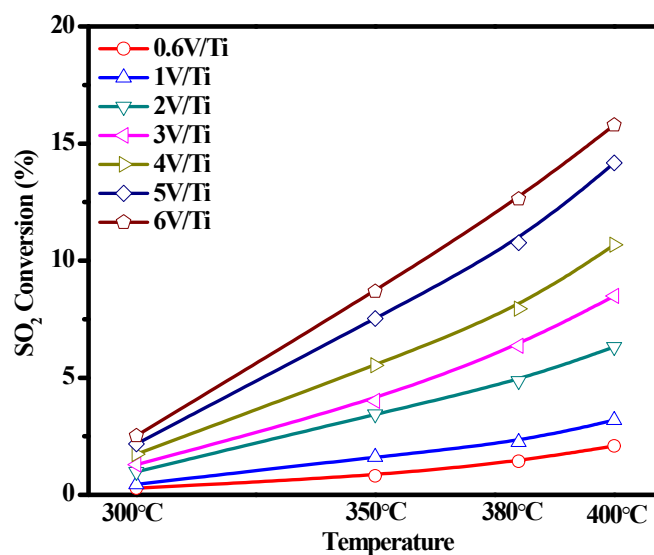

Fig. S1. SO<sub>2</sub> conversion of V<sub>2</sub>O<sub>5</sub>/TiO<sub>2</sub> catalysts as a function of vanadia loading and reaction temperature.

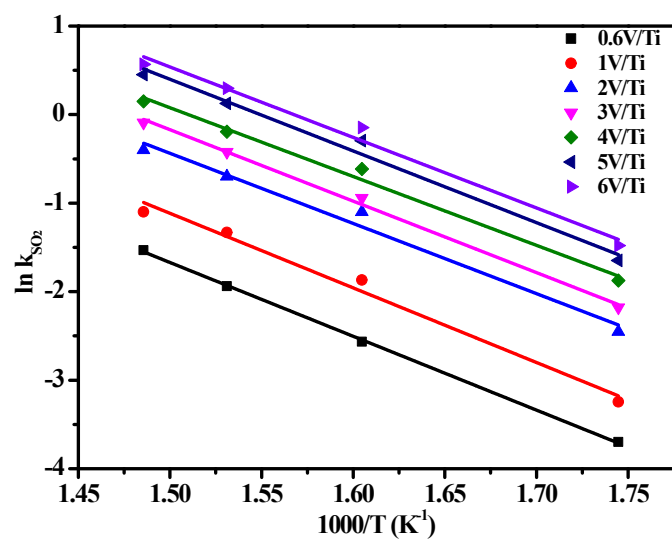

Fig. S2. Arrhenius plots of the SO<sub>2</sub> oxidation reaction rates of V<sub>2</sub>O<sub>5</sub>/TiO<sub>2</sub> catalysts with different vanadia loading.

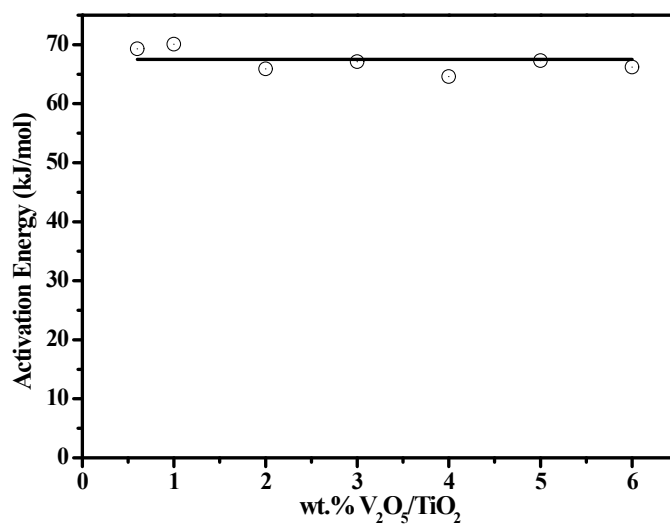

Fig. S3. Activation Energy of SO<sub>2</sub> oxidation of V<sub>2</sub>O<sub>5</sub>/TiO<sub>2</sub> catalysts with different vanadia loading.

References:

1. J. Svachula, L. J. Alemany, N. Ferlazzo, P. Forzatti, E. Tronconi and F. Bregani, *Ind. Eng. Chem. Res.*, 1993, 32, 826-834
